# Supplementary material for: Growth of millimeter-sized 2D metal iodide crystals induced by ion-specific preference at water-air interfaces
Source: PubMed Central journal article supplement (PMC11014996; doi:10.1038/s41467-024-47241-4), 2024-04-12
Supplement: 41467_2024_47241_MOESM2_ESM.pdf [file 41467_2024_47241_MOESM2_ESM.pdf]

## Peer Review File

---

Growth of millimeter-sized 2D metal iodide crystals induced by ion-specific preference at water-air interfaces

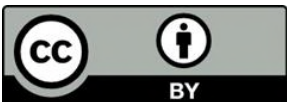

**Open Access** This file is licensed under a Creative Commons Attribution 4.0 International License, which permits use, sharing, adaptation, distribution and reproduction in any medium or format, as long as you give appropriate credit to the original author(s) and the source, provide a link to the Creative Commons license, and indicate if changes were made. In the cases where the authors are anonymous, such as is the case for the reports of anonymous peer reviewers, author attribution should be to 'Anonymous Referee' followed by a clear attribution to the source work. The images or other third party material in this file are included in the article's Creative Commons license, unless indicated otherwise in a credit line to the material. If material is not included in the article's Creative Commons license and your intended use is not permitted by statutory regulation or exceeds the permitted use, you will need to obtain permission directly from the copyright holder. To view a copy of this license, visit <http://creativecommons.org/licenses/by/4.0/>.

---

**Editorial Note:** This manuscript has been previously reviewed at another journal that is not operating a transparent peer review scheme. This document only contains reviewer comments and rebuttal letters for versions considered at *Nature Communications*.

---

## **REVIEWERS' COMMENTS**

### **Reviewer #3 (Remarks to the Author):**

I am very impressed by the authors' efforts in revising the manuscript, which have effectively addressed the concerns I previously raised as well as those of Reviewer #2. Hence, I recommend the acceptance of the manuscript for publication in Nature Communications.
